# Supplementary material
Source: Springer Nature journal article supplement (https://www.springermedizin.de/resource/supplementary/12962_2013_198_MOESM4_ESM.pdf/9571898)
Supplement: MOESM4 [file 9571898]

Identified studies from database search  
Total=258 (Pubmed= 42; Web of  
Science=46; Econlit=17; Embase=19;  
EED=19; SID:97; and Google Scholar=18)

Excluded according to inclusion  
criteria after screening abstracts  
(n=150)

- Not original (55)
- Not economic evaluation (54)
- Not related to Iran (6)
- Conference/meetings (22)
- Not in human (1)
- Duplicates (9)
- No full-text (3)

Potential Economic  
Evaluation studies  
(n=108)

Excluded according to inclusion  
criteria after screening entire article (n=78)

- Partial economic evaluation (22)
- Cost-of-illness (27)
- Not EE (burden of disease, no  
intervention etc.) (28)
- Not original (1)

Final sample of full  
economic evaluation  
studies (n=30)
